# Supplementary material
Source: PubMed Central journal article supplement (PMC6646777)
Supplement: ao8b01968_si_001.pdf [file ao8b01968_si_001.pdf]

## **Supporting Information**

# **Amperometric Glucose Sensing at Nanomolar Level Using MOF Encapsulated TiO<sub>2</sub> Platform**

*Anirban Paul<sup>a,b</sup>, Divesh N. Srivastava<sup>a,b,\*</sup>*

<sup>a</sup> Analytical and Environmental Division and Centralized Instrument Facility, <sup>b</sup> Academy of Scientific and Innovative Research (AcSIR) Council of Scientific & Industrial Research (CSIR), Central Salt and Marine Chemicals Research Institute (CSMCRI), G. B. Marg, Bhavnagar-364002, Gujarat, India.

\*Email- [dnsrivastava@csmcri.res.in](mailto:dnsrivastava@csmcri.res.in).

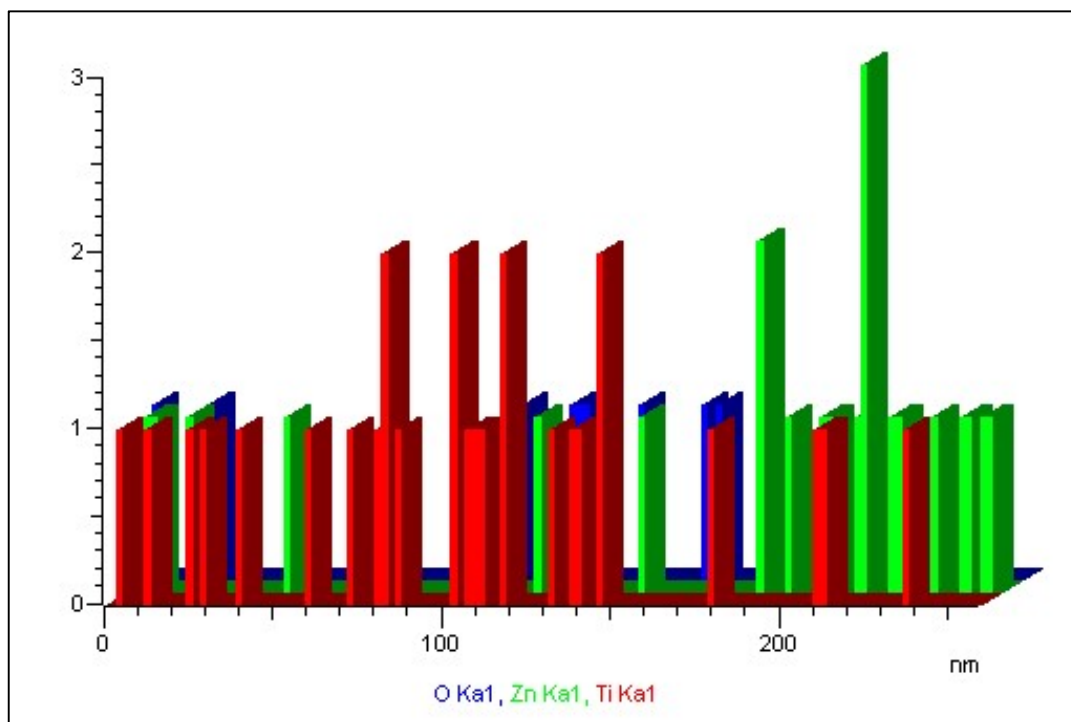

**Figure S1.** STEM-EDX mapping of TiO<sub>2</sub> (red colour building block) over ZIF-8 layers (green colour building block) showing equal spatial distribution of TiO<sub>2</sub>.

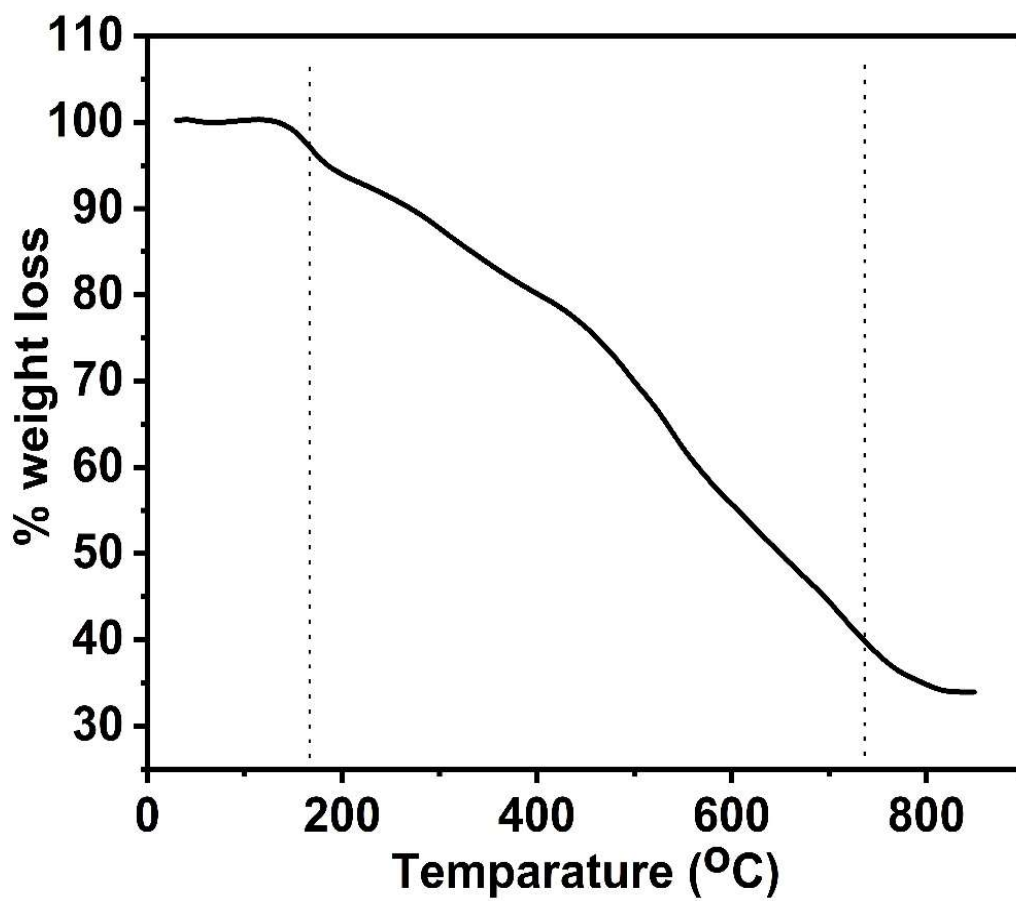

**Figure S2.** Thermogravimetric analysis of GO<sub>x</sub>@ZIF-8(TiO<sub>2</sub>) showing distinct degradation region at different temperature.

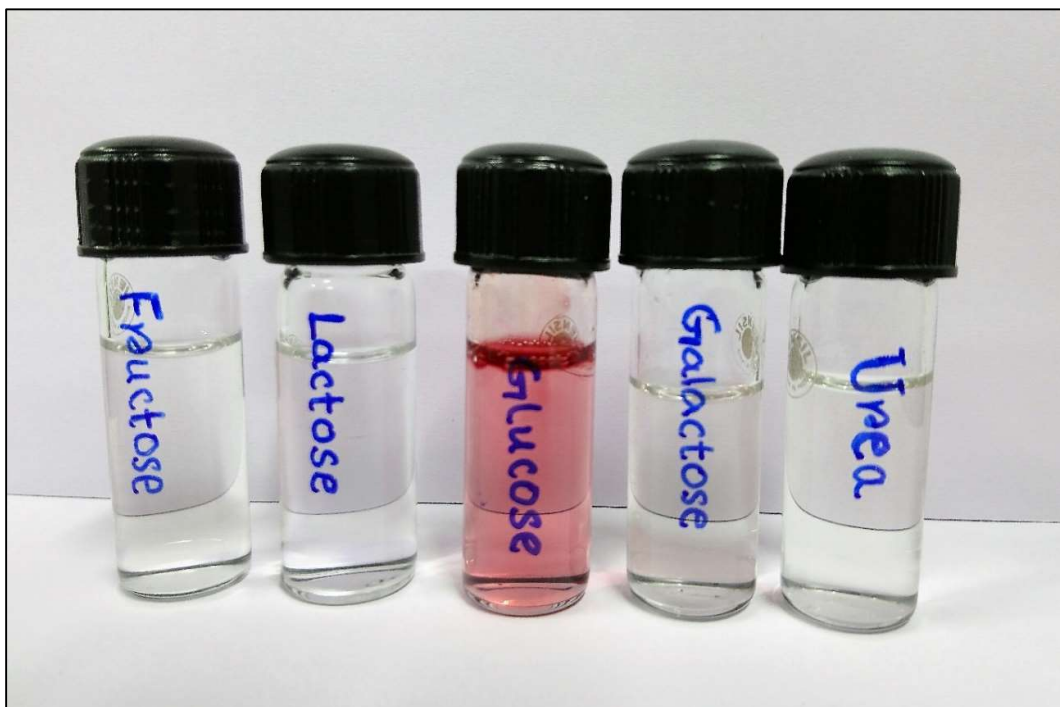

**Figure S3.** Optical image of the GOD-POD assay test output of the synthesized probe towards different interferent analyte.

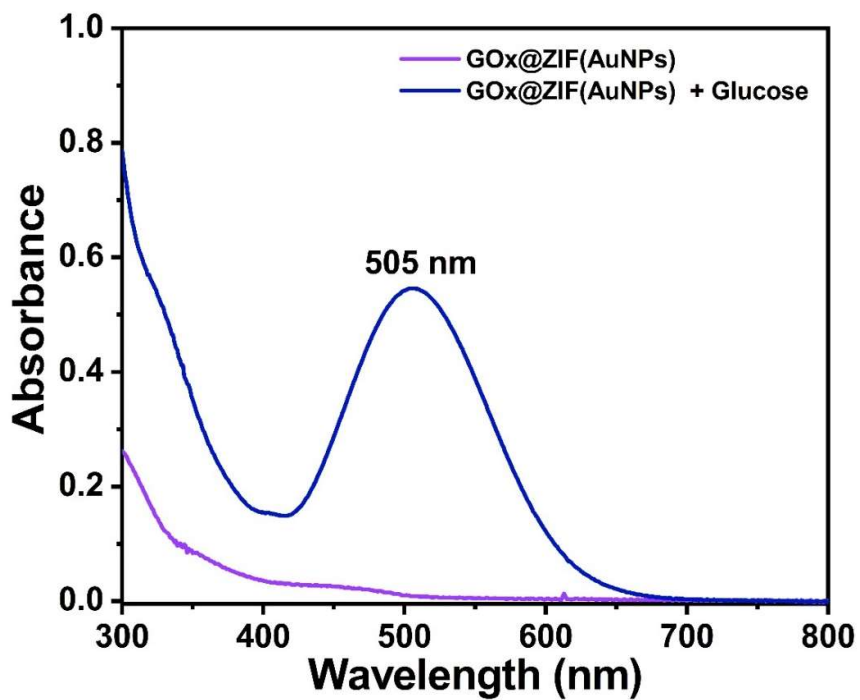

**Figure S4.** UV-VIS result of the probe  $\text{GO}_x@ZIF-8(\text{TiO}_2)$  upon GOD-POD assay test showing characteristic 505 nm peak for presence of  $\text{GO}_x$ .

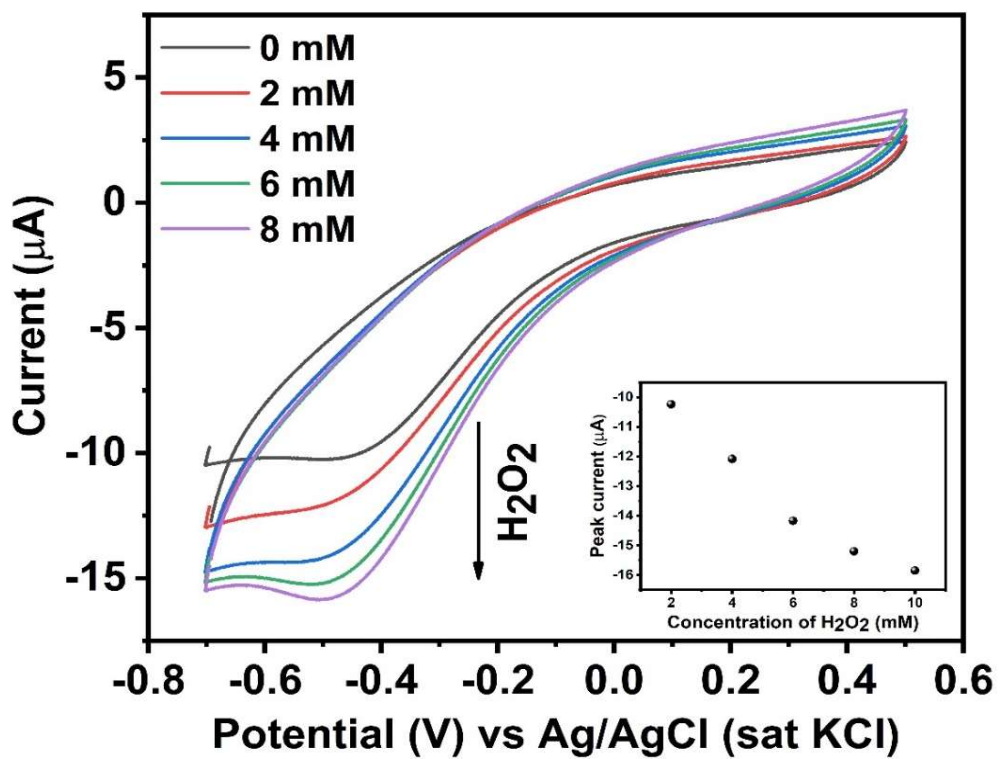

**Figure S5.** Cyclic voltammetry of synthesized probe with different concentration of H<sub>2</sub>O<sub>2</sub> in pH 7.4 PBS using three electrode cell setups. Calibration of cathodic peak current versus H<sub>2</sub>O<sub>2</sub> concentration is depicted inset.

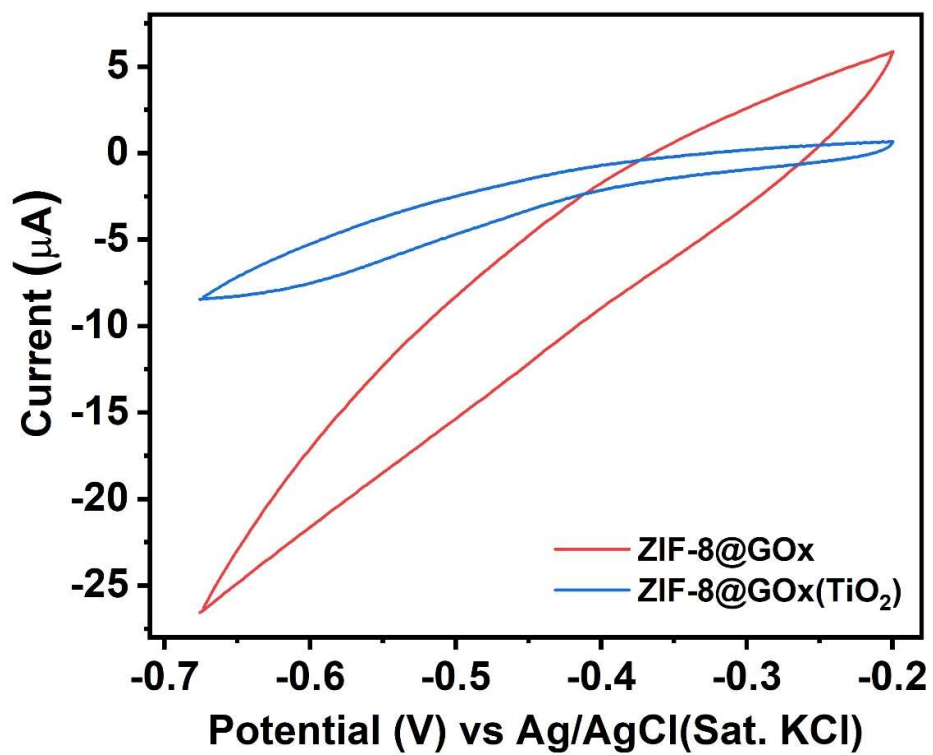

**Figure S6.** Comparative CV of ZIF-8@GOx and ZIF-8@GOx(TiO<sub>2</sub>) showing almost linear I-V type result for ZIF-8@GOx due to absence of capacitance provided by TiO<sub>2</sub> in as synthesized catalyst.

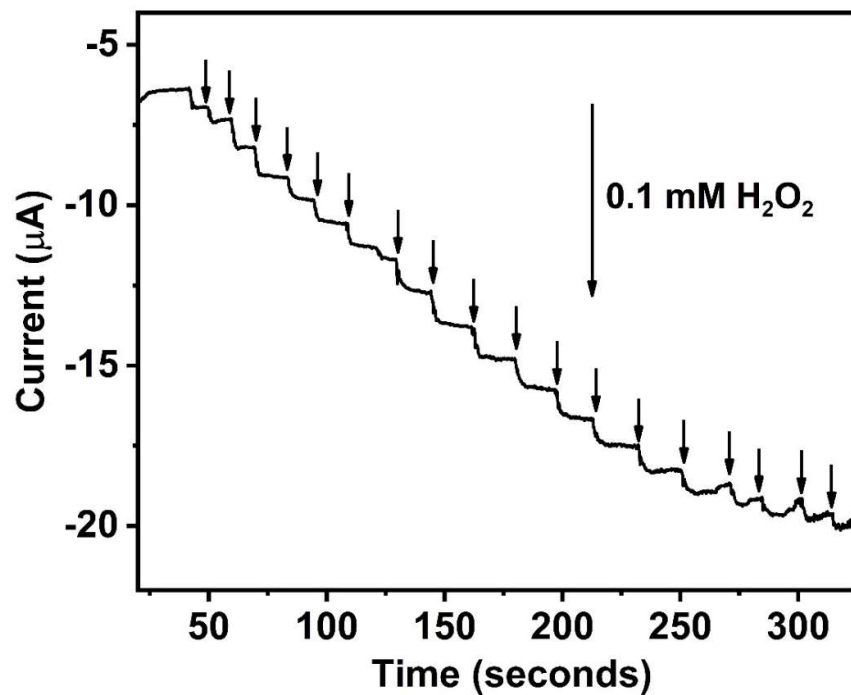

**Figure S7.** Amperometric response of synthesized probe at -0.45V vs Ag/AgCl (Sat. KCl) by successive addition of 0.1 mM H<sub>2</sub>O<sub>2</sub> in air saturated pH 7.4 PBS resulting a dynamic stair with quick steady state of current.
